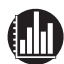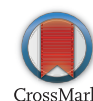

# Acute Kidney Injury Predicts Major Adverse Outcomes in Diabetes: Synergic Impact With Low Glomerular Filtration Rate and Albuminuria

Diabetes Care 2015;38:2333–2340 | DOI: 10.2337/dc15-1222

Mathilde Monseu,<sup>1,2,3,4</sup> Elise Gand,<sup>4</sup>  
Pierre-Jean Saulnier,<sup>1,2,3</sup>  
Stéphanie Ragot,<sup>1,2,3</sup> Xavier Piguel,<sup>4</sup>  
Philippe Zaoui,<sup>5,6</sup> Vincent Rigalleau,<sup>7</sup>  
Richard Marechaud,<sup>4,8</sup> Ronan Roussel,<sup>9,10</sup>  
Samy Hadjadj,<sup>1,2,3,4,8,11</sup> and  
Jean-Michel Halimi,<sup>12,13</sup> for the  
SURDIAGENE Study Group

## OBJECTIVE

Subjects with diabetes are prone to the development of cardiovascular and non-cardiovascular complications. In separate studies, acute kidney injury (AKI), albuminuria, and low estimated glomerular filtration rate (eGFR) were shown to predict adverse outcomes, but, when considered together, their respective prognostic value is unknown.

## RESEARCH DESIGN AND METHODS

Patients with type 2 diabetes consecutively recruited in the SURDIAGENE cohort were prospectively followed up for major diabetes-related events, as adjudicated by an independent committee: death (with cause), major cardiovascular events (myocardial infarction, stroke, congestive heart failure, amputation, and arterial revascularization), and renal failure (i.e., sustained doubling of serum creatinine level or end-stage renal disease).

## RESULTS

Intrahospital AKI occurred in 411 of 1,371 patients during the median follow-up period of 69 months. In multivariate analyses, AKI was significantly associated with cardiovascular and noncardiovascular death, including cancer-related death. In multivariate analyses, AKI was a powerful predictor of major adverse cardiovascular events, heart failure requiring hospitalization, myocardial infarction, stroke, lower-limb amputation or revascularization, and carotid artery revascularization. AKI, eGFR, and albuminuria, even when simultaneously considered in multivariate models, predicted all-cause and cardiovascular deaths. All three renal biomarkers were also prognostic of most adverse outcomes and of the risk of renal failure.

## CONCLUSIONS

AKI, low eGFR, and elevated albuminuria, separately or together, are compelling biomarkers of major adverse outcomes and death in diabetes.

Patients with diabetes are prone to the development of cardiovascular and renal complications (1). In addition, it was shown that infections and cancers develop in patients with diabetes more frequently than patients without diabetes (2,3). Abnormal albuminuria and low estimated glomerular filtration rate (eGFR) are risk

<sup>1</sup>Université de Poitiers, CIC1402, Poitiers, France

<sup>2</sup>Centre d'Investigation Clinique, CHU de Poitiers, Poitiers, France

<sup>3</sup>INSERM, CIC1402, Poitiers, France

<sup>4</sup>Service d'Endocrinologie, CHU de Poitiers, Pôle DUNE, Poitiers, France

<sup>5</sup>Service Néphrologie, Dialyse et Transplantation, CHU de Grenoble, La Tronche, France

<sup>6</sup>Faculté de Médecine, Domaine de la Merci, Université Joseph Fourier, Grenoble, France

<sup>7</sup>Service d'Endocrinologie, Diabétologie, Maladies Métaboliques et Nutrition, CHU de Bordeaux, Pessac, France

<sup>8</sup>Faculté de Médecine et Pharmacie, Université de Poitiers, Poitiers, France

<sup>9</sup>Université Paris 7 Denis Diderot, U695, Paris, France

<sup>10</sup>Service d'Endocrinologie, Diabétologie, Nutrition, Groupe Hospitalier Bichat Claude Bernard, Assistance Public-Hôpitaux de Paris, Paris, France

<sup>11</sup>INSERM, U1082, Poitiers, France

<sup>12</sup>Service de Néphrologie, CHU de Tours, Tours, France

<sup>13</sup>Université François-Rabelais, EA4245, Faculté de Médecine, Tours, France

Corresponding author: Jean-Michel Halimi, halimi@med.univ-tours.fr.

Received 6 June 2015 and accepted 24 September 2015.

This article contains Supplementary Data online at <http://care.diabetesjournals.org/lookup/suppl/doi:10.2337/dc15-1222/-/DC1>.

S.H. and J.-M.H. contributed equally to this work.

© 2015 by the American Diabetes Association. Readers may use this article as long as the work is properly cited, the use is educational and not for profit, and the work is not altered.



## Statistical Analyses

Quantitative data were expressed as the mean  $\pm$  SD or median (interquartile range [IQR]). Qualitative variables are given as number (percentage) of patients. Comparisons were conducted using a *t* test or Wilcoxon test for normally and nonnormally distributed continuous variables, respectively. Comparisons for categorical variables were performed with  $\chi^2$  or Fisher exact tests.

Kaplan-Meier curves were plotted to assess survival. We analyzed data by Cox proportional hazards models. AKI was used as a time-dependent variable. A stepwise descending procedure was used to determine every final multivariate model, as follows. All conventional variables were included in the models, as follows: eGFR, smoking, albuminuria, history of myocardial infarction, stroke, peripheral vascular disease, amputation in addition to AKI, eGFR, and/or albuminuria. All univariate significant variables were included in a maximized multivariate model, then we determined an optimized model with a backward procedure.

Integrated discrimination improvement (IDI) was calculated to quantify improvement in model performance after the addition of AKI in the models (established with a multivariate model).

All hypotheses were tested at the 5% level of significance. Statistical analyses were carried out using the SAS version 9.3 software package (SAS Inc, Cary, NC).

## RESULTS

### Baseline Characteristics of the Population

Among the 1,468 patients with type 2 diabetes enrolled in the SURDIAGENE cohort, 1,371 participants (58% men) were considered for the present analysis. We excluded 97 patients because 22 had reached ESRD at baseline, and 75 patients had no creatinine measurement during the follow-up.

Baseline characteristics of the study population are shown in Table 1. During the observation period (2002–2011), full hospitalization occurred at least once in 984 patients, and the total number of hospitalizations was 3,660. Overall, 12,456 serum creatinine determinations were available during the follow-up.

Overall, 43%, 35%, and 22% of patients had normoalbuminuria, microalbuminuria, and macroalbuminuria, respectively; eGFR was  $>60$  mL/min/1.73 m<sup>2</sup>

**Table 1—Baseline characteristics of the study population**

| Variables                          | All<br>(N = 1,371) | AKI<br>(n = 411; 30%) | No AKI<br>(n = 960; 70%) | P value |
|------------------------------------|--------------------|-----------------------|--------------------------|---------|
| Sex, n (%)                         |                    |                       |                          | 0.0003  |
| Men                                | 794 (58)           | 268 (65)              | 526 (55)                 |         |
| Women                              | 577 (42)           | 143 (35)              | 434 (45)                 |         |
| Age (years)                        | 65.2 $\pm$ 10.6    | 69.1 $\pm$ 9.6        | 63.5 $\pm$ 10.6          | <0.0001 |
| African ethnicity, n (%)           | 31 (2)             | 8 (2)                 | 23 (2)                   | 0.6081  |
| Follow-up duration (months)        | 57.3 $\pm$ 35.1    | 62.4 $\pm$ 31.2       | 55.1 $\pm$ 36.4          | 0.0004  |
| BMI (kg/m <sup>2</sup> )           | 31.4 $\pm$ 6.3     | 31.4 $\pm$ 6.7        | 31.4 $\pm$ 6.1           | 0.9994  |
| Active smoking, n (%)              | 144 (11)           | 43 (11)               | 101 (11)                 | 0.9141  |
| Diabetes duration (years)          | 14.5 $\pm$ 10.0    | 17.4 $\pm$ 10.5       | 13.2 $\pm$ 9.6           | <0.0001 |
| HbA <sub>1c</sub> (%)              | 7.8 $\pm$ 1.5      | 7.9 $\pm$ 1.5         | 7.7 $\pm$ 1.5            | 0.0197  |
| HbA <sub>1c</sub> (mmol/mol)       | 61.7 $\pm$ 16.4    | 62.8 $\pm$ 16.4       | 60.7 $\pm$ 16.4          | 0.0197  |
| Serum creatinine ( $\mu$ mol/L)    | 82 (32)            | 94 (46)               | 79 (27)                  | <0.0001 |
| eGFR (mL/min/1.73 m <sup>2</sup> ) | 73.6 $\pm$ 23.9    | 64.0 $\pm$ 24.6       | 77.7 $\pm$ 22.4          | <0.0001 |
| uACR (mg/mmol)                     | 3.0 (12.0)         | 7.7 (33.9)            | 2.3 (6.8)                | <0.0001 |
| Medical history at baseline, n (%) |                    |                       |                          |         |
| Myocardial infarction              | 210 (15)           | 82 (20)               | 128 (13)                 | 0.0018  |
| Stroke                             | 79 (6)             | 31 (8)                | 48 (5)                   | 0.0632  |
| Peripheral artery disease          | 309 (23)           | 128 (31)              | 181 (19)                 | <0.0001 |
| Amputation                         | 69 (5)             | 38 (9)                | 31 (3)                   | <0.0001 |
| Diabetic retinopathy               | 549 (41)           | 203 (50)              | 346 (37)                 | <0.0001 |
| Systolic blood pressure (mmHg)     | 132.3 $\pm$ 17.7   | 135.7 $\pm$ 18.7      | 130.9 $\pm$ 17.0         | <0.0001 |
| Diastolic blood pressure (mmHg)    | 72.3 $\pm$ 11.2    | 72.7 $\pm$ 11.7       | 72.2 $\pm$ 10.9          | 0.4585  |
| Total cholesterol (mmol/L)         | 4.8 $\pm$ 1.1      | 4.8 $\pm$ 1.1         | 4.7 $\pm$ 1.1            | 0.2897  |
| Resting heart rate (bpm)           | 73.3 $\pm$ 13.4    | 73.4 $\pm$ 13.7       | 73.2 $\pm$ 13.3          | 0.8839  |
| Treatments, n (%)                  |                    |                       |                          |         |
| Antiplatelet drugs                 | 581 (43)           | 202 (49)              | 379 (40)                 | 0.0011  |
| Vitamin K antagonists              | 175 (13)           | 84 (20)               | 91 (10)                  | <0.0001 |
| Antihypertensive drugs             | 1,144 (83)         | 378 (92)              | 766 (80)                 | <0.0001 |
| Diuretics                          | 633 (46)           | 223 (54)              | 410 (43)                 | 0.0001  |
| ARBs/ACEIs                         | 871 (64)           | 283 (69)              | 588 (61)                 | 0.0073  |
| Antidiabetic agents                | 1,316 (96)         | 399 (97)              | 917 (96)                 | 0.1776  |
| Metformin                          | 653 (48)           | 149 (36)              | 504 (53)                 | <0.0001 |
| Sulfonylureas                      | 550 (40)           | 136 (33)              | 414 (43)                 | 0.0004  |
| Glitazones                         | 16 (1)             | 1 (0)                 | 15 (2)                   | 0.0505  |
| Glycosidase inhibitors             | 79 (6)             | 18 (4)                | 61 (6)                   | 0.1460  |
| Insulin                            | 820 (60)           | 296 (72)              | 524 (55)                 | <0.0001 |
| NSAIDs                             | 40 (3)             | 14 (3)                | 26 (3)                   | 0.4897  |
| Lipid-lowering drugs               | 807 (59)           | 253 (62)              | 554 (58)                 | 0.1846  |

Quantitative variables are described by mean  $\pm$  SD or median (IQR), unless otherwise indicated. ACEIs, ACE inhibitors; ARBs, angiotensin 2 receptor blockers; NSAID, nonsteroidal anti-inflammatory drug.

in 73% of patients, between 30 and 59 mL/min/1.73 m<sup>2</sup> in 22% of patients, and  $<30$  mL/min/1.73 m<sup>2</sup> in 5% of patients.

Median follow-up was 69 months (IQR 36–90). At least one AKI episode developed in 411 patients (total number 838 AKI episodes; stage I 80%; stage II 14%; stage III 6%). The median number of hospitalizations before the development of AKI was 2 (range 1–16, IQR 1–4) in the AKI group, and 2 (range 1–17, IQR 1–3) in the non-AKI group.

Compared with subjects without AKI (hospitalized or not), those in whom AKI developed were older and more frequently

male, and had a longer duration of diabetes, a lower eGFR, a higher uACR, and a more frequent cardiovascular history (Table 1).

### AKI as a Predictor of All-Cause, Cardiovascular, and Noncardiovascular Death

During follow-up, 281 (29%) patients died. Annual mortality was 43 (IQR 38–48) per 1,000 patient-years. The causes of death were adjudicated as follows: cardiovascular events (*n* = 157), cancer (*n* = 45), infection (*n* = 22), and other causes (*n* = 57).

Survival rate was significantly lower in patients with AKI than in those without

AKI (log rank = 92.5,  $P < 0.0001$ ), and survival rates were significantly lower in patients with AKI stage II or stage III than in those with AKI stage I (Supplementary Fig. 1A). Similar results were found for cardiovascular and noncardiovascular death (Supplementary Fig. 1B and Fig. 1C).

#### Albuminuria, eGFR, AKI, and the Risk of All-Cause, Cardiovascular, and Noncardiovascular Death

When we considered AKI and eGFR together, we observed that both AKI and low eGFR increased the risk of all-cause death (Fig. 1A); the same held true for AKI and albuminuria when considered together (Fig. 1B). Similar findings were observed for cardiovascular death (Fig. 1C and D).

Baseline eGFR, albuminuria, and AKI were all significantly associated with the risk of all-cause and cardiovascular

death in the univariate analysis and in multivariate models (Table 2). In the univariate analysis, AKI was associated with an increased risk of noncardiovascular death, including cancer-related or infection-related deaths (Table 2). Albuminuria was significantly associated with cancer-related death, whereas low eGFR was significantly associated with infection-related death during follow-up (Table 2).

In multivariate models, AKI and albuminuria remained significantly associated with noncardiovascular deaths. Only AKI remained significantly associated with cancer-related death after multiple adjustments (Table 2). For infection-related death, adjustments on AKI, albuminuria, and eGFR could not be adequately tested due to a lack of power.

Adding the presence of AKI to established risk factors in the multivariate model improved the prediction of all-cause mortality, as shown by the significant improvement of IDI ( $-0.02$ ,  $P < 0.0001$ ). Similarly, prognosis significantly improved for cardiovascular and noncardiovascular deaths (IDI = 0.02 [ $P < 0.0001$ ] and IDI = 0.02 [ $P = 0.0004$ ], respectively).

#### Sensitivity Analyses

When using alternate definitions of AKI, results were grossly unchanged (see Supplementary Data, Sensitivity analyses).

Of note, the median time from AKI to the event was 10 months (range 0–71 months) for all-cause death, 13 months (range 0–71) for cardiovascular death, and 10 months (range 0–67 months) for noncardiovascular death. Overall,

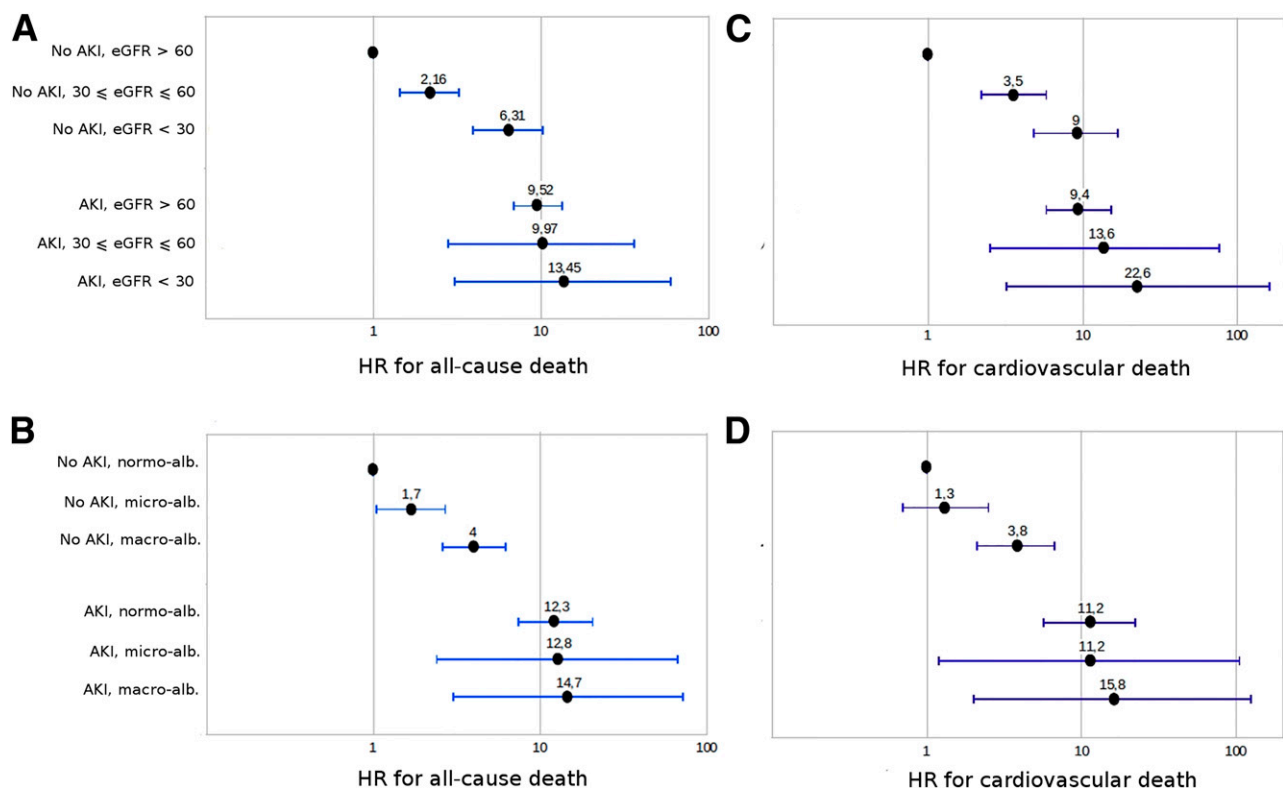

**Figure 1**—Combined risk of all-cause death and cardiovascular death associated with eGFR and development of AKI (A and C) and albuminuria and the development of AKI (B and D) considered together. Circle and lines indicate hazard ratio point estimates and 95% CIs. Labels on the lines represent hazard ratio estimates. AKI was diagnosed according to the KDIGO criteria as serum creatinine value increase  $>150\%$  or  $\geq 0.3$  mg/dL ( $\geq 26.5$   $\mu\text{mol/L}$ ) vs. baseline serum creatinine level. Albuminuria categories were defined as follows: normoalbuminuria, uACR  $<3$  mg/mmol; microalbuminuria, uACR  $\geq 3$  and  $\leq 30$  mg/mmol; and macroalbuminuria, uACR  $>30$  mg/mmol. Normoalbuminuria was present in 681 patients (50%), microalbuminuria was present in 467 patients (34%), and macroalbuminuria was present in 218 patients (16%). eGFR was  $>60$  mL/min/1.73 m<sup>2</sup> for 998 patients (73%), between 30 and 60 mL/min/1.73 m<sup>2</sup> for 298 patients (22%), and  $<30$  mL/min/1.73 m<sup>2</sup> for 75 patients (5%). The estimates were adjusted for baseline covariates, including smoking status and log uACR (A), smoking status and eGFR (B), and history of myocardial infarction and log uACR (C), and they were nonadjusted (D). All the parameters were significant as follows: for A: AKI ( $P < 0.0001$ ), eGFR stages ( $P < 0.0001$ ), and interaction between AKI and eGFR stages ( $P < 0.0001$ ); for B: AKI ( $P < 0.0001$ ), albuminuria categories ( $P < 0.0001$ ), and interaction between AKI and albuminuria categories ( $P = 0.0008$ ); for C: AKI ( $P < 0.0001$ ), eGFR stages ( $P < 0.0001$ ), and interaction between AKI and eGFR stages ( $P = 0.0116$ ); and for D: AKI ( $P < 0.0001$ ), albuminuria categories ( $P < 0.0001$ ), and interaction between AKI and albuminuria categories ( $P = 0.0354$ ). alb., albuminuria; HR, hazard ratio.



**Table 2—AKI, eGFR, and albuminuria as predictors of death**

|                                           | Univariate |            |         | Multivariate* |            |         |
|-------------------------------------------|------------|------------|---------|---------------|------------|---------|
|                                           | HR         | 95% CI     | P value | HR            | 95% CI     | P value |
| <b>All-cause deaths</b>                   |            |            |         |               |            |         |
| AKI (yes vs. no)                          | 7.38       | 5.76–9.46  | <0.0001 | 5.53          | 4.24–7.21  | <0.0001 |
| eGFR (per 10 mL/min/1.73 m <sup>2</sup> ) | 0.80       | 0.77–0.84  | <0.0001 | 0.92          | 0.87–0.97  | 0.0033  |
| Albuminuria (log mg/mmol)                 | 1.88       | 1.66–2.13  | <0.0001 | 1.38          | 1.19–1.59  | <0.0001 |
| <b>Cardiovascular deaths</b>              |            |            |         |               |            |         |
| AKI (yes vs. no)                          | 7.43       | 5.33–10.37 | <0.0001 | 4.81          | 3.39–6.82  | <0.0001 |
| eGFR (per 10 mL/min/1.73 m <sup>2</sup> ) | 0.74       | 0.70–0.79  | <0.0001 | 0.87          | 0.81–0.94  | 0.0002  |
| Albuminuria (log mg/mmol)                 | 2.13       | 1.80–2.52  | <0.0001 | 1.46          | 1.20–1.77  | 0.0002  |
| <b>Noncardiovascular deaths</b>           |            |            |         |               |            |         |
| AKI (yes vs. no)                          | 7.31       | 5.03–10.63 | <0.0001 | 6.43          | 4.35–9.51  | <0.0001 |
| eGFR (per 10 mL/min/1.73 m <sup>2</sup> ) | 0.89       | 0.83–0.96  | 0.0014  |               |            |         |
| Albuminuria (log mg/mmol)                 | 1.60       | 1.32–1.94  | <0.0001 | 1.28          | 1.05–1.57  | 0.0167  |
| <b>Cancer-related deaths</b>              |            |            |         |               |            |         |
| AKI (yes vs. no)                          | 5.85       | 3.13–10.93 | <0.0001 | 5.80          | 3.08–10.90 | <0.0001 |
| eGFR (per 10 mL/min/1.73 m <sup>2</sup> ) | 0.96       | 0.85–1.09  | 0.5438  |               |            |         |
| Albuminuria (log mg/mmol)                 | 1.43       | 1.03–1.99  | 0.0326  |               |            |         |
| <b>Infection-related deaths</b>           |            |            |         |               |            |         |
| AKI (yes vs. no)                          | 9.98       | 4.06–24.53 | <0.0001 |               |            |         |
| eGFR (per 10 mL/min/1.73 m <sup>2</sup> ) | 0.79       | 0.67–0.94  | 0.0062  |               |            |         |
| Albuminuria (log mg/mmol)                 | 1.46       | 0.91–2.35  | 0.1128  |               |            |         |

During follow-up, 281 (29%) patients died: causes of death were cardiovascular ( $n = 157$ ), cancer ( $n = 45$ ), infection ( $n = 22$ ), and other ( $n = 57$ ). HR, hazard ratio. \*A stepwise descending procedure was used to determine every final multivariate model: All-cause deaths, optimized model adjusted for AKI, eGFR, albuminuria, and smoking status; Cardiovascular deaths, optimized model adjusted for AKI, eGFR, albuminuria, and history of myocardial infarction; Noncardiovascular deaths, optimized model adjusted for AKI, albuminuria, and smoking status; Cancer-related deaths, optimized model adjusted for AKI and smoking status.

23 deaths (11 cardiovascular/12 noncardiovascular deaths) occurred within the first month after AKI: when these events were censored, the results were qualitatively unchanged (see Supplementary Data, Sensitivity analyses and Supplementary Table 1).

#### AKI, Albuminuria, eGFR, and Major Vascular Outcomes

During follow-up, vascular events were registered as follows: hospitalization for heart failure ( $n = 157$ , 16%), myocardial infarction ( $n = 81$ , 8%), stroke ( $n = 55$ , 6%), lower-limb amputation ( $n = 54$ , 6%), lower-limb revascularization ( $n = 60$ , 6%), coronary artery revascularization ( $n = 101$ , 10%), carotid artery revascularization ( $n = 25$ , 3%), and MACE ( $n = 238$ , 17%).

In univariate analysis, AKI, eGFR, and albuminuria were associated with MACE, hospitalization for heart failure, myocardial infarction, stroke, lower-limb amputation, lower-limb revascularization, and coronary artery revascularization during follow-up. Only AKI was significantly associated with carotid artery revascularization (Table 3).

Using multivariate analyses, AKI was associated with all of the major cardiovascular

outcomes, whereas eGFR and albuminuria were inconsistently associated with these outcomes (Table 3).

#### AKI, Low eGFR, and Albuminuria as Predictors of Renal Risk

Renal failure (i.e., sustained doubling of serum creatinine level or ESRD) occurred in 79 patients (8%) during follow-up. Time to renal failure was significantly associated with AKI (log rank 19.2,  $P < 0.0001$ ).

As expected, AKI, eGFR, and albuminuria were associated with renal failure in univariate and multivariate analyses when these three renal parameters were entered into the models (Table 3).

#### CONCLUSIONS

In the present prospective inception cohort, we adjudicated causes of death (cardiovascular, cancer, infection, or other causes) and major cardiovascular and renal events in subjects with type 2 diabetes. We carefully analyzed the prognostic value of AKI, low eGFR, and abnormal albuminuria alone or in combination on relevant diabetes-related events. The two major findings of the study were as follows: 1) AKI was a

powerful predictor of all-cause death, noncardiovascular and cardiovascular deaths, and all major cerebrovascular, cardiovascular, and renal events and 2) AKI, low eGFR, and albuminuria remained predictors of all-cause and cardiovascular deaths, even when considered simultaneously.

In the current study, we observed for the first time that AKI predicted the risk of all-cause death and cardiovascular death in a cohort specifically dedicated to patients with type 2 diabetes. Similar data were observed in other populations, notably after myocardial infarction or coronary revascularization (13). To the best of our knowledge, our study is also the first to demonstrate a strong and robust relationship between AKI and noncardiovascular death. Surprisingly, we found that AKI was associated with cancer-related and infection-related death.

Furthermore, AKI predicted the risk of chronic nonfatal myocardial infarction, hospitalization for heart failure, lower-limb amputation and revascularization, carotid and coronary revascularization, nonfatal stroke, and renal failure. The risk of subsequent coronary events or stroke was increased in patients with AKI in most studies (8,14,15). A greater risk of hospitalization for heart failure after myocardial infarction or percutaneous coronary revascularization procedure was also noted (7,8). However, we were able to identify other major consequences of AKI such as lower-limb amputation and revascularization or carotid revascularization.

The results of our study extend the relationship between AKI and adverse outcomes even further to patients with diabetes and to all relevant major cardiovascular and noncardiovascular events that we have analyzed. These findings are important because the incidence of cardiovascular and cerebrovascular events remains greater in patients with diabetes compared with patients without diabetes, although the number of major complications declined from 1990 to 2010 (1). Moreover, patients with diabetes also have a greater risk of cancer and infection than subjects without diabetes (2,3).

The need for reliable and simple risk sensors is thus of outmost importance in diabetes. Importantly, AKI remained a significant marker of outcome regardless of



or in addition to eGFR and albuminuria to predict cardiovascular events, including heart failure. Taken together, these results suggest that the information regarding the risk of death or cardiovascular death conveyed by these renal markers is not redundant.

Interestingly, AKI was a predictor of renal failure and, when simultaneously considered, AKI, low eGFR, and albuminuria remained significant predictors and refined the estimation of the risk of renal failure in subjects with diabetes. Although low GFR and microalbuminuria/macroalbuminuria remained powerful predictors of all-cause death and cardiovascular death, even after adjustment for AKI, AKI seemed the most powerful biomarker of major events.

Admittedly, our study has several limits. We did not focus our analysis on the exact cause of AKI. However, most of our cases of AKI were stage I, which could result from many situations, including sepsis, dehydration, or use of nephrotoxic medications. It was not possible to assess whether the cause of AKI could play a role in our findings. Although our end points considered cardiovascular and renal outcomes, which are major in diabetes, other relevant diabetic microvascular end points, such as retinopathy or neuropathy, were not studied. In addition, only AKI in inpatients were considered. AKI in outpatients may have different predictive value on outcomes. However, to our knowledge, this type of analysis has not been performed in the literature.

Finally, the results of our monocentric study need to be replicated.

Our study has also some strengths. It is a relatively large prospective study with a long-term follow-up. Of note, 85% of studies reporting the long-term consequences of AKI were retrospective in a recent meta-analysis (13). In the present report, an independent committee adjudicated all events of interest, and records were individually handled and reviewed using hospital discharge summaries, interviews with general practitioners, and biochemical data. This point is probably crucial, although rarely performed in the literature: most studies only use administrative records to determine clinical outcomes, although this method was recently questioned (23,24).

To our knowledge, the current study is also the first to examine the risk for death, cardiovascular events, and non-cardiovascular events in a comprehensive way in relation to AKI, albuminuria, and eGFR, considered separately or together, and the first one evaluating the long-term risk of AKI in consecutively recruited patients with diabetes.

In conclusion, AKI is a powerful predictor of major cerebrovascular, cardiovascular, and noncardiovascular events and deaths in individuals with type 2 diabetes. All three renal markers (AKI, eGFR, and albuminuria) alone or considered together are synergistically predictors of total and cardiovascular deaths, and renal outcomes.

**Acknowledgments.** The authors thank all patients followed up for their kind participation in this research and the adjudication committee of the SURDIAGENE study.

**Funding.** The SURDIAGENE study was supported by grants from the French Ministry of Health (PHRC-Poitiers 2004 and PHRC-IR 2008) and AFD (Research Grant 2003). Groupe d'Etude des Maladies Métaboliques et Systémiques (Poitiers, France) supported the current study.

The funders had no involvement in study design, or in the collection, analyses, and interpretation of the data.

**Duality of Interest.** No potential conflicts of interest relevant to this article were reported.

**Author Contributions.** M.M. searched the literature, constructed the figures, wrote and edited the article, and contributed to the discussion. E.G. performed the statistical analysis, constructed the figures, edited the article, and contributed to the discussion. P.-J.S., S.R., X.P., P.Z., V.R., R.M., and R.R. edited the article and contributed to the discussion. S.H. designed the study, proposed the current analysis, searched the literature, wrote and edited the article, and contributed to the discussion. J.-M.H. proposed the current analysis, searched the literature, wrote and edited the article, and contributed to the discussion. J.-M.H. is the guarantor of this work and, as such, had full access to all the data in the study and takes responsibility for the integrity of the data and the accuracy of the data analysis.

## References

- Gregg EW, Li Y, Wang J, et al. Changes in diabetes-related complications in the United States, 1990–2010. *N Engl J Med* 2014;370:1514–1523
- Muller LM, Gorter KJ, Hak E, et al. Increased risk of common infections in patients with type 1 and type 2 diabetes mellitus. *Clin Infect Dis* 2005;41:281–288
- Michels KB, Solomon CG, Hu FB, et al.; Nurses' Health Study. Type 2 diabetes and subsequent incidence of breast cancer in the Nurses' Health Study. *Diabetes Care* 2003;26:1752–1758

- Mogensen CE. Microalbuminuria predicts clinical proteinuria and early mortality in maturity-onset diabetes. *N Engl J Med* 1984;310:356–360
- Go AS, Chertow GM, Fan D, McCulloch CE, Hsu CY. Chronic kidney disease and the risks of death, cardiovascular events, and hospitalization. *N Engl J Med* 2004;351:1296–1305
- Lo LJ, Go AS, Chertow GM, et al. Dialysis-requiring acute renal failure increases the risk of progressive chronic kidney disease. *Kidney Int* 2009;76:893–899
- James MT, Ghali WA, Knudtson ML, et al.; Alberta Provincial Project for Outcome Assessment in Coronary Heart Disease (APPROACH) Investigators. Associations between acute kidney injury and cardiovascular and renal outcomes after coronary angiography. *Circulation* 2011;123:409–416
- Chawla LS, Amdur RL, Shaw AD, Faselis C, Palant CE, Kimmel PL. Association between AKI and long-term renal and cardiovascular outcomes in United States veterans. *Clin J Am Soc Nephrol* 2014;9:448–456
- Chawla LS, Eggers PW, Star RA, Kimmel PL. Acute kidney injury and chronic kidney disease as interconnected syndromes. *N Engl J Med* 2014;371:58–66
- Hadadj S, Fumeron F, Roussel R, et al.; DIABHYCAR Study Group; DIAB2NEPHROGENE Study Group; SURDIAGENE Study Group. Prognostic value of the insertion/deletion polymorphism of the ACE gene in type 2 diabetic subjects: results from the Non-insulin-dependent Diabetes, Hypertension, Microalbuminuria or Proteinuria, Cardiovascular Events, and Ramipril (DIABHYCAR), Diabète de type 2, Néphropathie et Génétique (DIAB2NEPHROGENE), and Survie, Diabète de type 2 et Génétique (SURDIAGENE) studies. *Diabetes Care* 2008;31:1847–1852
- Levey AS, Stevens LA, Schmid CH, et al.; CKD-EPI (Chronic Kidney Disease Epidemiology Collaboration). A new equation to estimate glomerular filtration rate. *Ann Intern Med* 2009;150:604–612
- Kellum JA, Lameire N; KDIGO AKI Guideline Work Group. Diagnosis, evaluation, and management of acute kidney injury: a KDIGO summary (part 1). *Crit Care* 2013;17:204
- Coca SG, Yusuf B, Shlipak MG, Garg AX, Parikh CR. Long-term risk of mortality and other adverse outcomes after acute kidney injury: a systematic review and meta-analysis. *Am J Kidney Dis* 2009;53:961–973
- Rihal CS, Textor SC, Grill DE, et al. Incidence and prognostic importance of acute renal failure after percutaneous coronary intervention. *Circulation* 2002;105:2259–2264
- Wu V-C, Wu C-H, Huang T-M, et al.; NSARF Group. Long-term risk of coronary events after AKI. *J Am Soc Nephrol* 2014;25:595–605
- Ratliff BB, Rabadi MM, Vasko R, Yasuda K, Goligorsky MS. Messengers without borders: mediators of systemic inflammatory response in AKI. *J Am Soc Nephrol* 2013;24:529–536
- Wencker D, Chandra M, Nguyen K, et al. A mechanistic role for cardiac myocyte apoptosis in heart failure. *J Clin Invest* 2003;111:1497–1504
- James MT, Hemmelgarn BR, Wiebe N, et al.; Alberta Kidney Disease Network. Glomerular filtration rate, proteinuria, and the incidence and

consequences of acute kidney injury: a cohort study. *Lancet* 2010;376:2096–2103

19. Matsushita K, van der Velde M, Astor BC, et al.; Chronic Kidney Disease Prognosis Consortium. Association of estimated glomerular filtration rate and albuminuria with all-cause and cardiovascular mortality in general population cohorts: a collaborative meta-analysis. *Lancet* 2010;375:2073–2081

20. Velagaleti RS, Gona P, Larson MG, et al. Multimarker approach for the prediction of

heart failure incidence in the community. *Circulation* 2010;122:1700–1706

21. Matsushita K, Sang Y, Ballew SH, et al. Cardiac and kidney markers for cardiovascular prediction in individuals with chronic kidney disease: the Atherosclerosis Risk in Communities study. *Arterioscler Thromb Vasc Biol* 2014;34:1770–1777

22. Masson S, Latini R, Milani V, et al.; GISSI-HF Investigators. Prevalence and prognostic value of elevated urinary albumin excretion in patients with chronic heart failure: data from the

GISSI-Heart Failure trial. *Circ Heart Fail* 2010;3:65–72

23. Grams ME, Waikar SS, MacMahon B, Whelton S, Ballew SH, Coresh J. Performance and limitations of administrative data in the identification of AKI. *Clin J Am Soc Nephrol* 2014;9:682–689

24. Vlasschaert MEO, Bejaimal SAD, Hackam DG, et al. Validity of administrative database coding for kidney disease: a systematic review. *Am J Kidney Dis* 2011;57:29–43
